# Supplementary material for: Enhanced photocatalytic performance of bismuth vanadate assisted by polyoxometalates and phthalocyanine
Source: Royal Society of Chemistry journal article supplement (doi:10.1039/c8nj04378g), 2018-01-01
Supplement: c8nj04378g1.pdf [file c8nj04378g1.pdf]

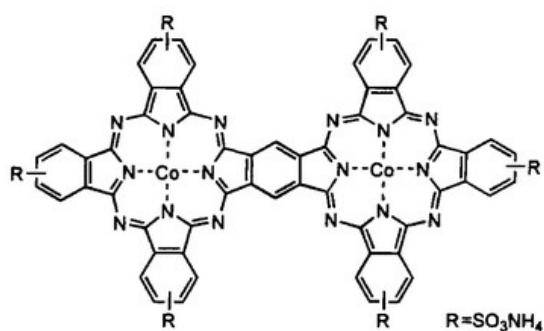

Scheme 1 Binuclear phthalocyanine (bi-CoPc)

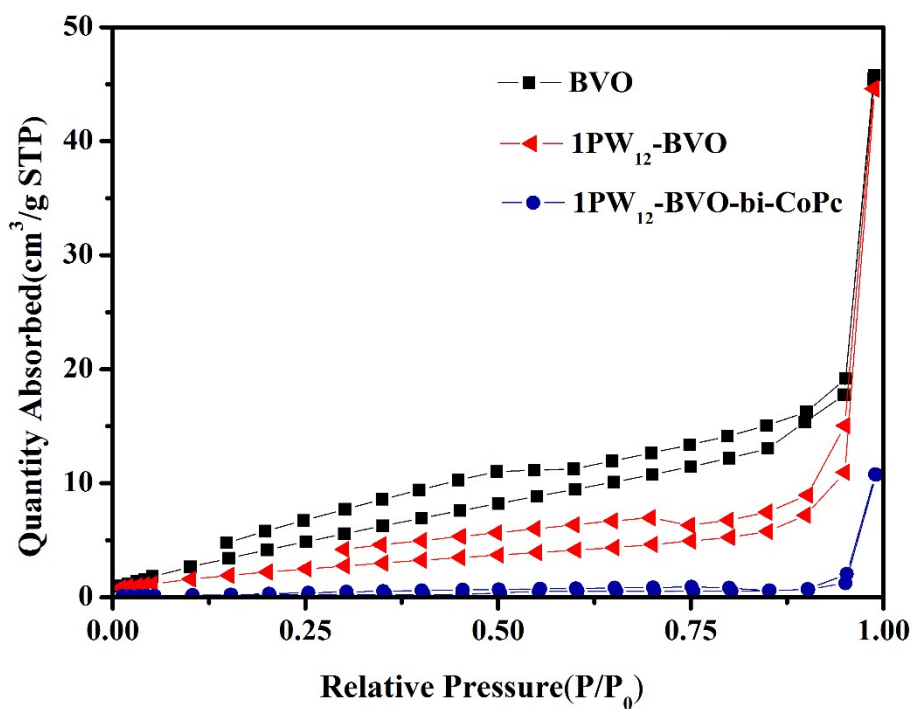

**Fig. S1.** Nitrogen adsorption-desorption isotherms curves of samples BVO, 1PW<sub>12</sub>-BVO, and 1PW<sub>12</sub>-BVO-bi-CoPc.

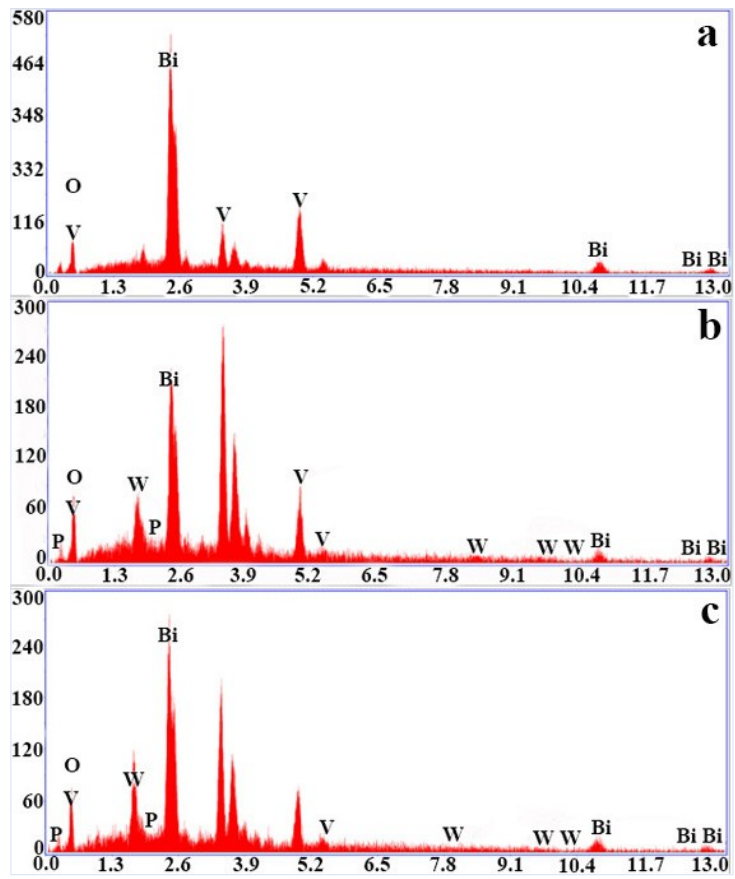

**Fig. S2.** EDX of different samples of (a) BVO; (b) 1PW<sub>12</sub>-BVO; (c) 2PW<sub>12</sub>-BVO.

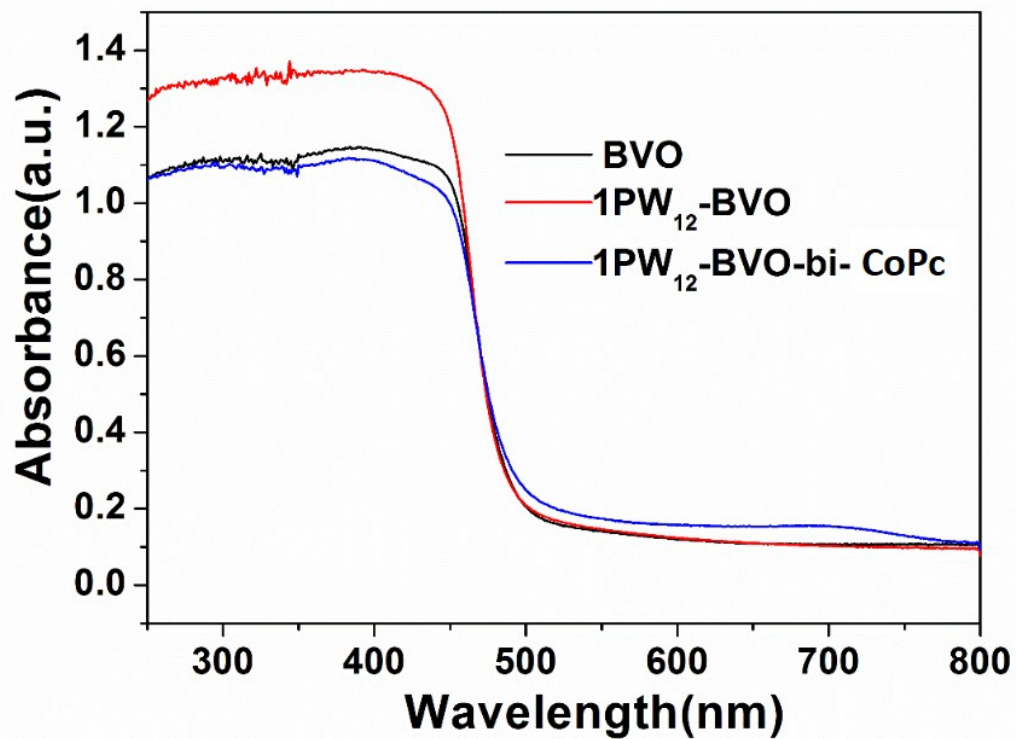

Fig. S3. UV-visible diffuse reflection spectra of BVO, 1PW<sub>12</sub>-BVO and 1PW<sub>12</sub>-BVO-bi-CoPc.

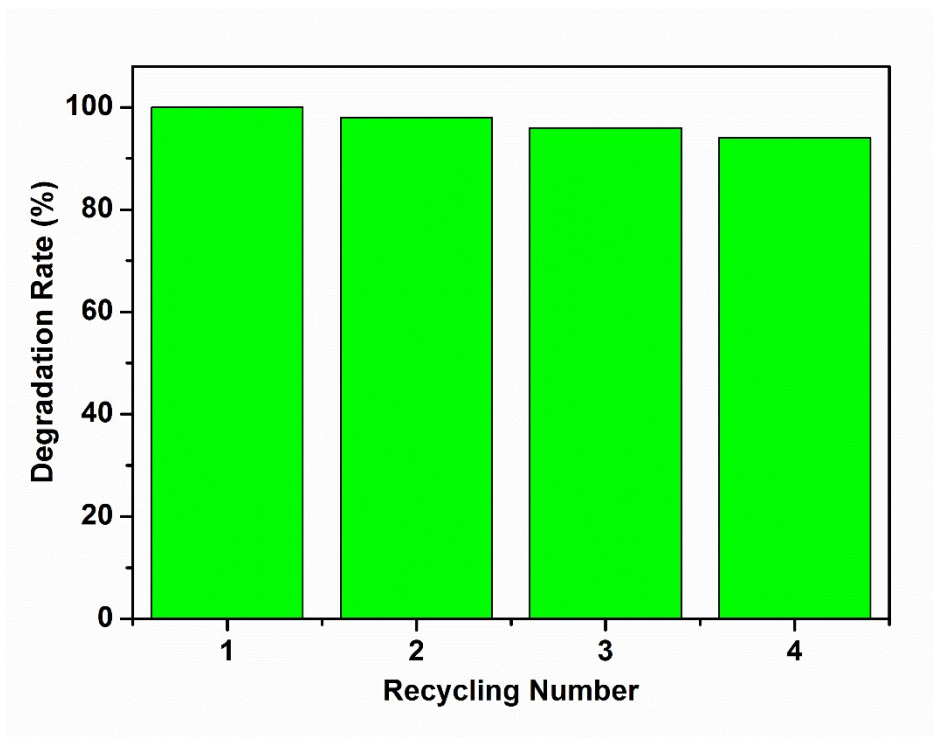

Fig S4. The degradation rate of NO<sub>2</sub> over recycled 1PW<sub>12</sub>-BVO-bi-CoPc film.

**Table S1.** The BET surface area of BVO, 1PW<sub>12</sub>-BVO, and 1PW<sub>12</sub>-BVO-bi-CoPc.

| <b>Sample</b>                       | <b>BET/m<sup>2</sup>·g<sup>-1</sup></b> |
|-------------------------------------|-----------------------------------------|
| <b>BVO</b>                          | <b>10.35</b>                            |
| <b>1PW<sub>12</sub>-BVO</b>         | <b>8.89</b>                             |
| <b>1PW<sub>12</sub>-BVO-bi-CoPc</b> | <b>0.17</b>                             |

**Table S2.** The resistances of different photocatalysts from the fitting results with the equivalent circuit.

| Sample                         | $R_s$                        | $R_{ct}$                     |
|--------------------------------|------------------------------|------------------------------|
|                                | [ $\Omega$ cm <sup>2</sup> ] | [ $\Omega$ cm <sup>2</sup> ] |
| BVO                            | 280                          | 14742                        |
| 1PW <sub>12</sub> -BVO         | 195.8                        | 9115                         |
| 2PW <sub>12</sub> -BVO         | 266                          | 13999                        |
| BVO-bi-CoPc                    | 244                          | 11794                        |
| 1PW <sub>12</sub> -BVO-bi-CoPc | 137.1                        | 6381                         |
| 2PW <sub>12</sub> -BVO-bi-CoPc | 215.4                        | 10032                        |
